# Supplementary material for: Elucidating the influence of supervisors’ roles on implementation climate
Source: PubMed Central journal article supplement (PMC6815002; doi:10.1186/s13012-019-0939-6), 2019-10-25
Supplement: 13012_2019_939_MOESM2_ESM.pdf [file 13012_2019_939_MOESM2_ESM.pdf]

**Supplemental File 2**  
**Gateway CALL Phase II – Years 3 & 4**  
**Focus Group Guide**

(with Alicia's prompts and probes)

Pre Conversation

- Welcome! Thank you for volunteering to participate in this focus group.
- The purpose of our conversation this morning is to learn more Gateway CALL.
- Before we introduce ourselves we have a bit of business to address (ground rules) ...
- Introductions – around the room
- Any questions before we begin?

Focus Group Conversation

1. Let's begin by talking about the screening and assessment **tools** for Gateway CALL. What do you think of them?
  - a. Are they accurate? Easy to use?
  - b. Useful? What would make the process more useful?
  - c. Have you had trouble using the tools? What kind?
  - d. How has this impacted your work-load?
  - e. What do you like about the questions/answers? Dislike?
2. What have you had to change about your **practice or routines** to use the new screening and assessment tools?
  - a. Have you had to change up your routines? How so?
  - b. Have you seen others change their routines to use the new tools successfully?
3. Think back to when you began using these new **tools**. Were there any supports or structures put in place that influenced how you used the new tools? By structures, I mean policies, rules, procedures, resources, or infrastructure.
  - a. What has been the most helpful to you for using the tools?
  - b. Have these supports been constant or have they changed over time? How so? What has that meant for your practice?
4. How have your **colleagues** influenced how you use the tools? Can you provide an example?
  - a. Outside FCCS – with other agencies?
  - b. Inside FCCS – with supervisors? Colleagues? Leadership?
  - c. What relationships have been most helpful to you as you implement these tools?
5. Have you or your unit made any **adaptations or changes** to the tools or process?
  - a. Is everyone using the process similarly within your team? Across units?
    - i. How have the procedures changed? What was the rationale for the adjustment?
6. How have the screening/assessment tools impacted your **day to day work**?
  - a. How have caregivers reacted to the tools?
  - b. How has it impacted your relationship with the CALL team/FCCS workers?
  - c. How has it impacted your referrals?
  - d. Has it impacted the number of kids who are connected with services? Linkage time?
7. Let's switch gears a bit and talk about **training**. Do you feel that the training on the tools provided you with all of the information necessary to implement the screening/assessment tools?
  - a. Is any follow up needed?
  - b. What about the training worked well? What could have been different?

8. What **advice** do you have for other agencies who are interested in replicating GWC?
  - a. What do you think is most critical for implementing a program like this effectively? What could be done differently?
  - b. If you could go back in time, what advice would you give to yourself about Gateway CALL?
  
9. Summary major points – we talked about the tools and process, what’s changed for you, how it’s impacted your work, training, and advice you’d give others. **Have we missed anything?**
